# Supplementary material for: A mechanism study on the efficient conversion of cellulose to acetol over Sn–Co catalysts with low Sn content
Source: Royal Society of Chemistry journal article supplement (doi:10.1039/d0gc02345k), 2020-01-01
Supplement: d0gc02345k1.pdf [file d0gc02345k1.pdf]

# **A mechanism study on efficient conversion of cellulose to acetol over Sn-Co catalysts with low Sn content**

*Xiaohao Liu<sup>a,c</sup>, Xiaodong Liu<sup>b</sup>, Haiyong Wang<sup>a</sup>, Tianci Xiao<sup>b</sup>, Ying Zhang<sup>b\*</sup>,*

*Longlong Ma<sup>a,c\*</sup>*

a CAS Key Laboratory of Renewable Energy, Guangdong Key Laboratory of New and Renewable Energy Research and Development, Guangzhou Institute of Energy Conversion, Chinese Academy of Sciences, Guangzhou 510640, China

b Department of Chemistry, University of Science and Technology of China, Hefei, 230026, China.

c University of Chinese Academy of Sciences, Beijing 100049, China

\* E-mail: zhzhying@ustc.edu.cn

mall@ms.giec.ac.cn

**Table S1.** Metal contents of Sn-M/SiO<sub>2</sub> catalysts.

| Catalyst                    | Content(wt%) <sup>a</sup> |     |     | Atom%(Sn/M)       |                      |
|-----------------------------|---------------------------|-----|-----|-------------------|----------------------|
|                             | Sn                        | Co  | Ni  | Bulk <sup>a</sup> | Surface <sup>b</sup> |
| 2%Sn-10%Co/SiO <sub>2</sub> | 2.1                       | 9.5 |     | 0.110             | 0.097                |
| 2%Sn-10%Ni/SiO <sub>2</sub> | 2.2                       |     | 9.3 | 0.117             | 0.095                |
| 5%Sn-10%Co/SiO <sub>2</sub> | 5.2                       | 9.4 |     | 0.275             | 0.093                |
| 5%Sn-10%Ni/SiO <sub>2</sub> | 5.4                       |     | 9.5 | 0.281             | 0.084                |

<sup>a</sup> measured by AAS; <sup>b</sup> measured by XPS.

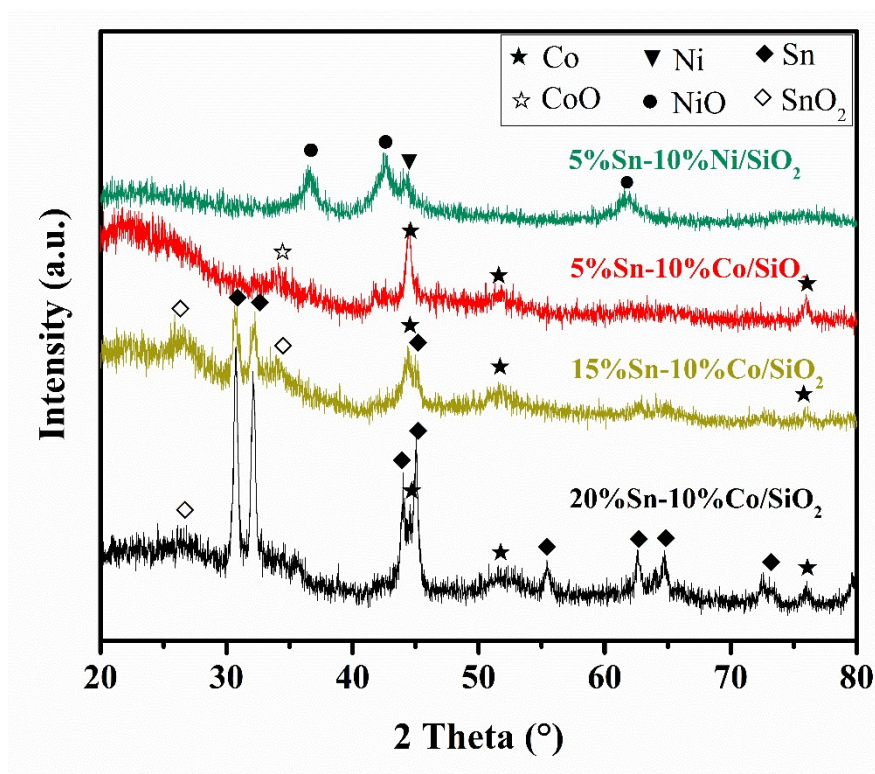

**Figure S1.** XRD patterns of Sn-M/SiO<sub>2</sub> catalysts

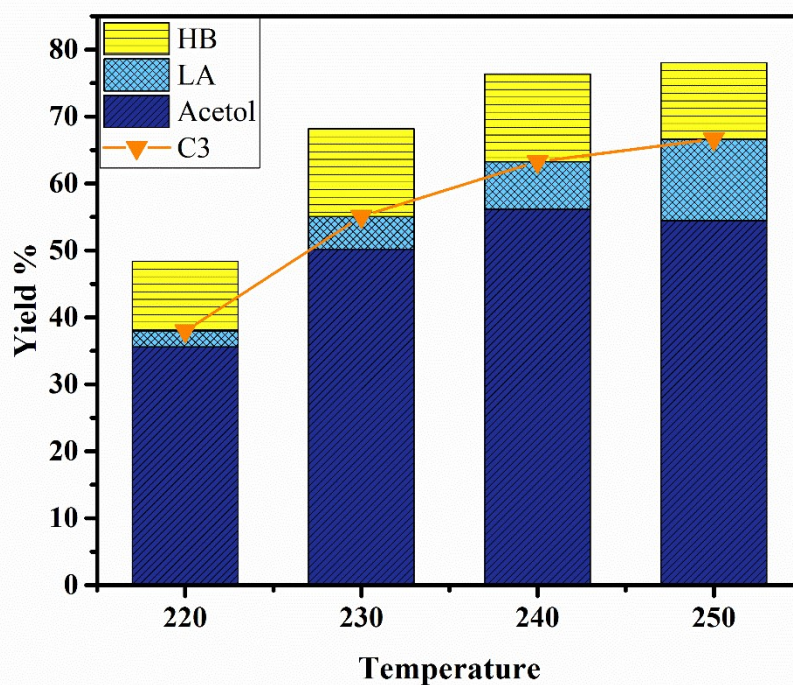

**Figure S2.** Effect of reaction temperature on cellulose conversion. Reaction conditions: 50 mg of cellulose, 34 mg of catalyst, 10 mL of H<sub>2</sub>O, 4 MPa H<sub>2</sub>, 1 h..

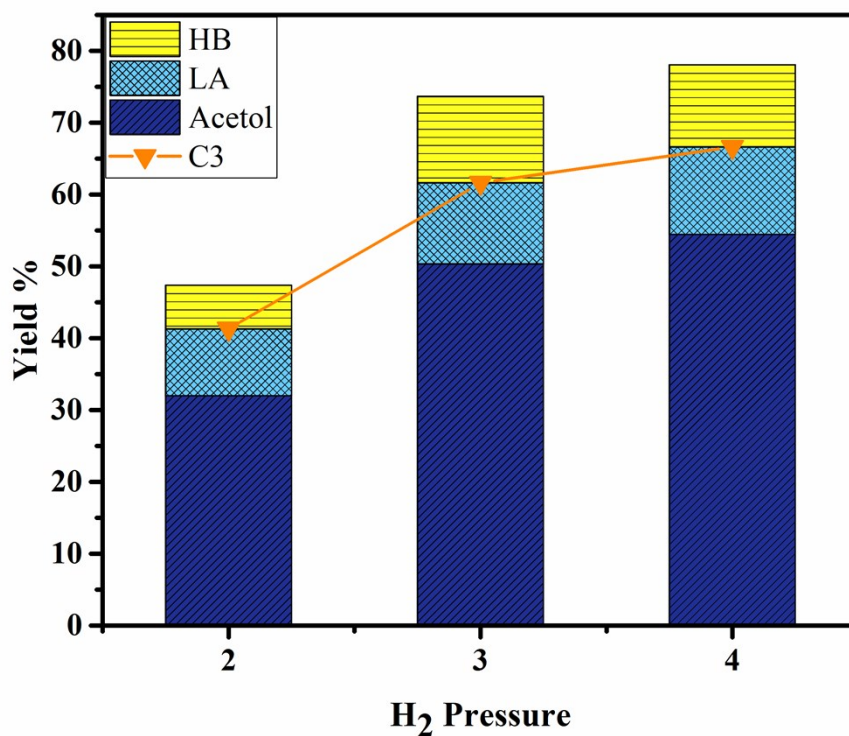

**Figure S3.** Effect of H<sub>2</sub> pressure on cellulose conversion. Reaction conditions: 50 mg of cellulose, 34 mg of catalyst, 10 mL of H<sub>2</sub>O, 250 °C, 1 h.

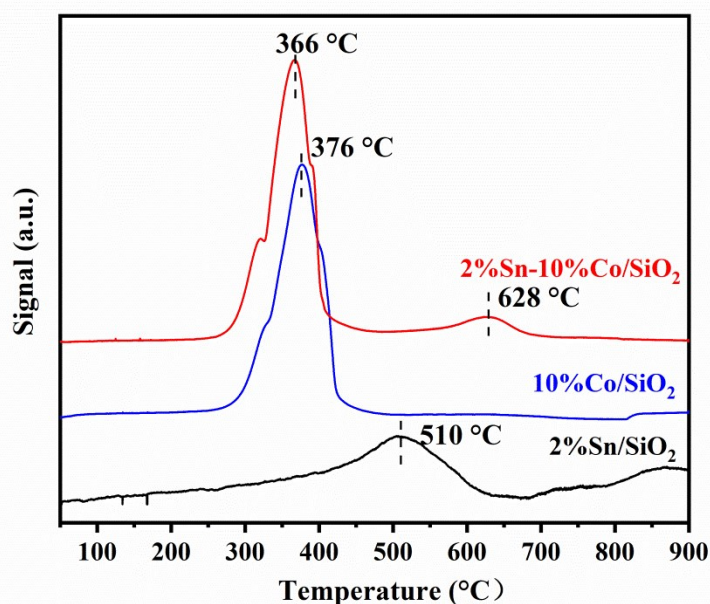

**Figure S4.** H<sub>2</sub>-TPR profiles for 2%Sn/SiO<sub>2</sub>, 10%Co/SiO<sub>2</sub> and 2%Sn-10%Co/SiO<sub>2</sub>. The signal of 2%Sn/SiO<sub>2</sub> is increased by 6 times.

In order to detect the oxidation state of Sn and Co, H<sub>2</sub>-TPR was carried out. For 2%Sn/SiO<sub>2</sub>, the reduction peak at 510 °C is attributed to the reduction of SnO<sub>2</sub>, and

the reduction peak at  $>800^{\circ}\text{C}$  should be attributed to the reduction of tin oxides interacted with silica, which is more difficult to be reduced. For  $\text{Co}/\text{SiO}_2$ , an overlapping peak at  $376^{\circ}\text{C}$  was observed, indicating that cobalt oxides are easily reduced. When Sn and Co were co-loaded on  $\text{SiO}_2$ , the reduction peak of tin oxides significantly shifted to low temperature. The reduction peak at high temperature ( $>800^{\circ}\text{C}$  in 2%  $\text{Sn}/\text{SiO}_2$ ) moved to  $618^{\circ}\text{C}$ , and the peak at low temperature ( $510^{\circ}\text{C}$  in 2%  $\text{Sn}/\text{SiO}_2$ ) disappeared, which should overlap with the reduction peak of cobalt oxides. The presence of Co significantly promoted the reduction of tin oxides. This could be because Co promoted the dissociation of  $\text{H}_2$  to active H, and the active H migrated onto tin oxides to promote its reduction. According to the results of  $\text{H}_2$ -TPR, the reduction temperature of  $400^{\circ}\text{C}$  in this work can reduce most of the cobalt oxides, but only part of the tin oxides, which is consistent with the results of XPS, XRD and HRTEM.

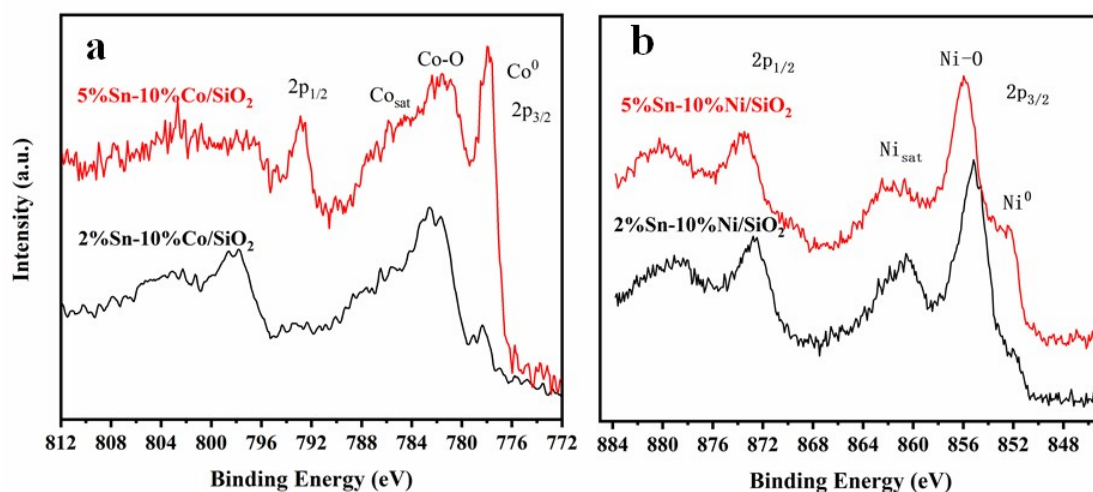

**Figure S5.** Ex-situ XPS spectra of a) Co and b) Ni of  $\text{Sn-M}/\text{SiO}_2$  ( $\text{M}=\text{Ni}$  or  $\text{Co}$ ).

The XPS spectra of Co and Ni are shown in the figures S5. Whether it is Co or Ni, both zero valence and the oxidation state coexist on the catalyst surface. According to  $\text{H}_2$ -TPR, a reduction temperature of  $400^{\circ}\text{C}$  should be able to reduce most of the cobalt oxides, but the ex-situ XPS showed only a small part of  $\text{Co}^0$ , and most of which was in the oxidation state. This was because the  $\text{Co}^0$  on the surface of the catalyst was oxidized after treatment with 1%  $\text{O}_2/\text{N}_2$  mixed gas. It can be proved by the in-situ XPS (Figure S6), that is, a large amount of  $\text{Co}^0$  exists on the catalyst surface. A similar phenomenon was also found in  $\text{Sn-Ni}/\text{SiO}_2$  catalysts.  $\text{Sn}/\text{M}$  ( $\text{M}=\text{Co}$  or  $\text{Ni}$ ) on the catalyst surface was also analyzed. As shown in the table below, for the 2% $\text{Sn}$ -10% $\text{M}/\text{SiO}_2$  catalyst, the surface  $\text{Sn}/\text{M}$  ratio was similar. Increasing the Sn content to 5%, the surface  $\text{Sn}/\text{M}$  ratio did not change significantly, even slightly decreased. This may be due to the interaction between Sn and metal M to allow Sn to enter the inside of the particles, resulting in a low surface  $\text{Sn}/\text{M}$  ratio. In addition, the change of metal particle size may also affect the surface  $\text{Sn}/\text{M}$  ratio. Compared with the reaction results, the surface  $\text{Sn}/\text{M}$  value has no positive correlation with the catalytic activity, so the surface  $\text{Sn}/\text{M}$  should not be the main factor affecting the catalytic activity.



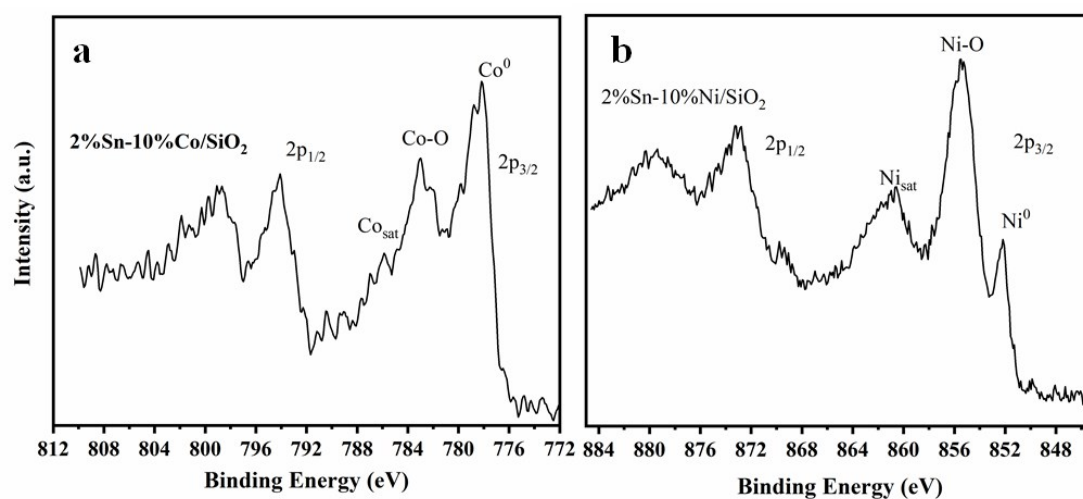

**Figure S6.** In-situ XPS spectra of a) Co and b) Ni of 2%Sn-10%M/SiO<sub>2</sub> (M=Ni or Co).

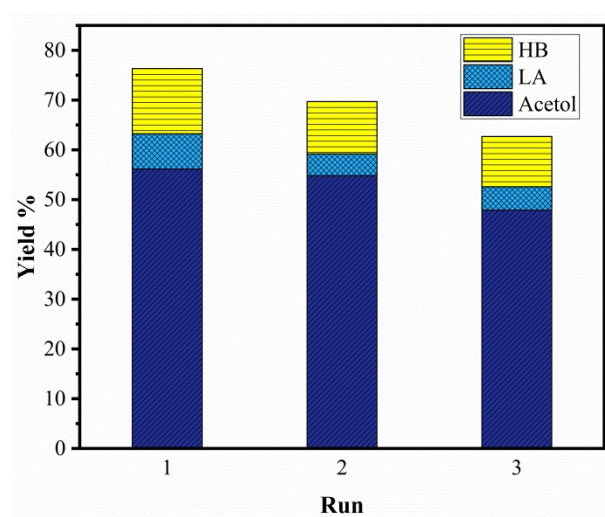

**Figure S7.** Recycle of 2%Sn-10%Co/SiO<sub>2</sub> catalyst. Reaction conditions: 50 mg of cellulose, 34 mg of catalyst, 10 mL of H<sub>2</sub>O, 240 °C, 4 MPa H<sub>2</sub>, 1 h.
